# Supplementary material
Source: MDPI journal article supplement (https://www.mdpi.com/2078-1547/10/1/2)
Supplement: s1 [file s1]

# Supplementary Materials: Improving Health and Wealth by Introduction of an Affordable Bacterial Starter Culture for Probiotic Yoghurt Production in Uganda

Nieke Westerik, Alex Paul Wacoo, Esther Anyimo, William Matovu, Gregor Reid, Remco Kort and Wilbert Sybesma

**Table S1.** Improving Health and Wealth by an intervention with an affordable starter for locally produced probiotic yoghurt in Uganda – Main partners.

| Name                                                           | Type                          | Location                               | Main task in the project                                                                                              |
|----------------------------------------------------------------|-------------------------------|----------------------------------------|-----------------------------------------------------------------------------------------------------------------------|
| Yoba for Life Foundation                                       | Non-Governmental Organization | The Netherlands                        | Coordination, starter culture development, technical expertise on local yoghurt production in rural Africa and beyond |
| Heifer International                                           | Non-Governmental Organization | Uganda (Headquarters: US)              | Providing connections with farmers and dairy cooperatives                                                             |
| SNV (The Dutch Development Organization)                       | Non-Governmental Organization | Uganda (Headquarters: The Netherlands) | Support and advice, including providing funding to promote Yoba yoghurt at pre-primary schools in South-West Uganda   |
| Uganda Industrial Research Institute (UIRI)                    | Research Institute            | Uganda                                 | Starter culture distribution, microbial analysis of yoghurt samples, technical advice to producers                    |
| Makerere University                                            | Research Institute            | Uganda                                 | Research development of non-dairy probiotic products by using the Yoba probiotic starter culture                      |
| VU (Free University)                                           | Research Institute            | The Netherlands                        | Supporting PhD research in Uganda on probiotic yoghurt related topics                                                 |
| Dairy Development Authority (DDA)                              | Governmental institution      | Uganda                                 | Monitoring, technical advice and regulation of production units                                                       |
| CSK                                                            | Private sector company        | The Netherlands                        | Starter culture production                                                                                            |
| Lactosan GmbH & Co                                             | Private sector company        | Austria                                | Drying of starter cultures                                                                                            |
| Netherlands Organization for Applied Scientific Research (TNO) | Research Institute            | The Netherlands                        | Isolation of the <i>Lactobacillus rhamnosus</i> GG strain and genome analysis                                         |

**Table S2.** Average cost and profits per liter of probiotic yoghurt in Uganda as function of production volumes. Note: Sales price is set at 4.000 UGX per liter.

| Raw material, transport and labor | Fixed/Variable Cost (F/V) | Price (UGX per unit) | Unit                         |
|-----------------------------------|---------------------------|----------------------|------------------------------|
| Fresh Milk (wet season)           | V                         | 1000                 | Liter <sup>I</sup>           |
| Sugar                             | V                         | 5000                 | Kg <sup>II</sup>             |
| Flavor                            | V                         | 35.000               | Liter <sup>III</sup>         |
| Packaging material                | V                         | 40                   | Polythene bag <sup>IV</sup>  |
| Yoba starter culture              | F                         | 2.500                | One gram sachet <sup>V</sup> |
| Firewood                          | F                         | 2.000                | Bundle                       |
| Water (20L cans)                  | F                         | 200                  | 20 L <sup>VI</sup>           |
| Labor                             | F                         | 1.500                | Hour                         |
| Distribution/Transport            | F                         | 4.000                | -                            |

<sup>I</sup> Average value. Cost of milk can vary greatly per region (villages that have a contract with a milk processor buy at lower prices even down to 600 UGX, producers located in town usually buy at higher prices, e.g up to 1600 UGX) and is also influenced by wet and dry season (higher price in dry season due to lower supply). <sup>II</sup> Average value. Dosing at 5%. <sup>III</sup> Dosing at 0.1%. <sup>IV</sup> The estimated price of one package (polythene bag) is 40 UGX, the price per liter assumes that the yoghurt is packed in portions of 250 ml. <sup>V</sup> One gram can be used for up to 100 liter. <sup>VI</sup> Average value. Depending on the availability of water the price of one jerry can of 20 L can range between 200 UGX and 500 UGX. <sup>VII</sup> Price generally used as wholesale price when the yoghurt is sold through external shops.

**Table S3.** Mechanisms behind the implementation of sustainable probiotic yoghurt production units and related effects. Inspired by the McKinsey Psychology of Change Management (Lawson E, Price C. The psychology of change management. McKinsey Q. 2003;30–41).

| Targets for sustainable implementation                                                                                                                                                                                                                                                                                                                                                                                                                                                                                                                                                                                                                                                                                                                                                                                                                                                                                                                                                                                       |
|------------------------------------------------------------------------------------------------------------------------------------------------------------------------------------------------------------------------------------------------------------------------------------------------------------------------------------------------------------------------------------------------------------------------------------------------------------------------------------------------------------------------------------------------------------------------------------------------------------------------------------------------------------------------------------------------------------------------------------------------------------------------------------------------------------------------------------------------------------------------------------------------------------------------------------------------------------------------------------------------------------------------------|
| <ul style="list-style-type: none"> <li>Capacity building: Giving training and sharing knowledge on how to become an independent yoghurt producer. Observations made during the training facilitate continuous improvement for next trainings.</li> <li>Reinforcing mechanisms: When production units are diverting from the prescribed production protocol, they are likely to obtain yoghurt of unacceptable quality which they are not able to market.</li> <li>Understanding and conviction: Giving background information to yoghurt producers why adherence to the protocol and strict hygiene are important, how a well-managed business can be profitable, and why the yoghurt is beneficial to the health of the consumers.</li> <li>Role models: Organizing central trainings and exchange visits in which production units learn from one another and become motivated to upgrade. Namatovu <i>et al.</i> (77) found that 84% of the Ugandan youth entrepreneurs have role models for their businesses.</li> </ul> |
| Responses from the producers and yoghurt market in general                                                                                                                                                                                                                                                                                                                                                                                                                                                                                                                                                                                                                                                                                                                                                                                                                                                                                                                                                                   |
| <ul style="list-style-type: none"> <li>Internal adoption: targeted groups have become sustainable active production units after the intervention.</li> <li>Internal adaptation: Production units continue to invest in their yoghurt businesses beyond project support.</li> <li>External response: The project attracts partners.</li> <li>External expansion: Producers making yoghurt before the intervention join the project and start producing high-quality probiotic yoghurt.</li> </ul>                                                                                                                                                                                                                                                                                                                                                                                                                                                                                                                             |

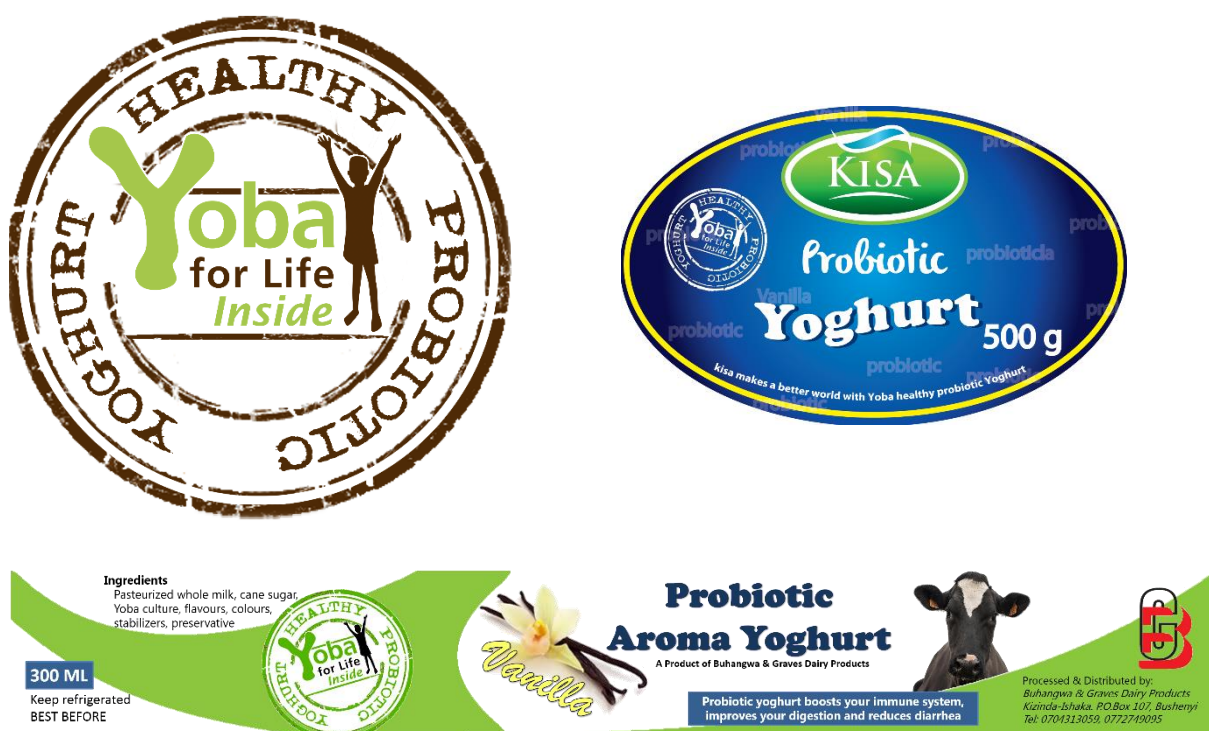

**Figure S1.** Picture of the “Yoba Inside” brand added benefit mark and two examples of packaging design used by local producers.
